# Supplementary material
Source: PubMed Central journal article supplement (PMC7420955)
Supplement: mmc1.pdf [file mmc1.pdf]

Online supporting information for the following article

Impact of climate and ambient air pollution on the epidemic growth during COVID-19 outbreak in Japan

Kenichi Azuma<sup>1</sup>, Naoki Kagi<sup>2</sup>, Hoon Kim<sup>3</sup>, Motoya Hanashi<sup>4</sup>

*1 Corresponding Author: Department of Environmental Medicine and Behavioral Science, Kindai University Faculty of Medicine, Osakasayama, Osaka, Japan*

*2 Department of Mechanical and Environmental Informatics, Graduate School of Information Science and Engineering, Tokyo Institute of Technology, Tokyo, Japan*

*3 Department of Environmental Health, National Institute of Public Health, Wako, Saitama, Japan*

*4 Laboratory of Environmental Space Design, Division of Architecture, Faculty of Engineering, Hokkaido University, Sapporo, Hokkaido, Japan*

Table S1. List of analysed 28 geographical areas

| Area        | Population | Total land area (km <sup>2</sup> ) |
|-------------|------------|------------------------------------|
| Nagoya      | 2,295,638  | 326.45                             |
| Naha        | 319,435    | 39.98                              |
| Gifu        | 406,735    | 203.60                             |
| Sendai      | 1,082,159  | 786.30                             |
| Kyoto       | 1,475,183  | 827.83                             |
| Hiroshima   | 1,194,034  | 906.68                             |
| Saitama     | 1,263,979  | 217.43                             |
| Tokorozawa  | 340,386    | 72.11                              |
| Kawaguchi   | 578,112    | 61.95                              |
| Yokohama    | 3,724,844  | 437.56                             |
| Kawasaki    | 1,475,213  | 143.01                             |
| Sagamihara  | 720,780    | 328.91                             |
| Kanazawa    | 465,699    | 468.64                             |
| Ichikawa    | 481,732    | 57.45                              |
| Matsudo     | 483,480    | 61.38                              |
| Chiba       | 971,882    | 271.77                             |
| Funabashi   | 622,890    | 85.62                              |
| Sakai       | 839,310    | 149.82                             |
| Suita       | 374,468    | 36.09                              |
| Osaka       | 2,691,185  | 225.21                             |
| Tokyo       | 13,515,271 | 2,193.96                           |
| Toyama      | 418,686    | 1,241.77                           |
| Fukui       | 265,904    | 536.41                             |
| Fukuoka     | 1,538,681  | 343.39                             |
| Kitakyushu  | 961,286    | 491.95                             |
| Kobe        | 1,537,272  | 557.02                             |
| Nishinomiya | 487,850    | 99.96                              |
| Sapporo     | 1,952,356  | 1,121.26                           |

Table S2. Correlations between climate factors and ambient air pollutants

|                                      | Mean temperature | Mean daily minimum temperature | Mean daily maximum temperature | Precipitation | Sunshine hours | Mean wind speed | Mean relative humidity | Mean daily minimum relative humidity | Mean absolute humidity | NO       | NO <sub>2</sub> | Ox    | SPM     | PM <sub>2.5</sub> |
|--------------------------------------|------------------|--------------------------------|--------------------------------|---------------|----------------|-----------------|------------------------|--------------------------------------|------------------------|----------|-----------------|-------|---------|-------------------|
| Mean temperature                     | 1                |                                |                                |               |                |                 |                        |                                      |                        |          |                 |       |         |                   |
| Mean daily minimum temperature       | 0.909**          | 1                              |                                |               |                |                 |                        |                                      |                        |          |                 |       |         |                   |
| Mean daily maximum temperature       | 0.831**          | 0.566**                        | 1                              |               |                |                 |                        |                                      |                        |          |                 |       |         |                   |
| Precipitation                        | -0.105           | 0.052                          | -0.330**                       | 1             |                |                 |                        |                                      |                        |          |                 |       |         |                   |
| Sunshine hours                       | 0.108            | -0.126                         | 0.429**                        | -0.810**      | 1              |                 |                        |                                      |                        |          |                 |       |         |                   |
| Mean wind speed                      | 0.130            | 0.213*                         | -0.010                         | -0.082        | 0.001          | 1               |                        |                                      |                        |          |                 |       |         |                   |
| Mean relative humidity               | -0.118           | 0.128                          | -0.425**                       | 0.764**       | -0.880**       | -0.082          | 1                      |                                      |                        |          |                 |       |         |                   |
| Mean daily minimum relative humidity | 0.026            | 0.265**                        | -0.321**                       | 0.773**       | -0.871**       | -0.111          | 0.931**                | 1                                    |                        |          |                 |       |         |                   |
| Mean absolute humidity               | 0.696**          | 0.844**                        | 0.318**                        | 0.345**       | -0.446**       | 0.062           | 0.570**                | 0.653**                              | 1                      |          |                 |       |         |                   |
| NO                                   | 0.089            | 0.017                          | 0.168*                         | -0.110        | 0.229*         | -0.259**        | -0.279**               | -0.160                               | -0.093                 | 1        |                 |       |         |                   |
| NO <sub>2</sub>                      | 0.089            | -0.034                         | 0.224**                        | -0.027        | 0.232*         | -0.427**        | -0.258**               | -0.108                               | -0.123                 | 0.856**  | 1               |       |         |                   |
| Ox                                   | 0.373**          | 0.283**                        | 0.353**                        | -0.500**      | 0.402**        | 0.334**         | -0.342**               | -0.376**                             | 0.060                  | -0.329** | -0.449**        | 1     |         |                   |
| SPM                                  | 0.419**          | 0.282**                        | 0.439**                        | -0.094        | 0.324**        | -0.178*         | -0.183*                | -0.098                               | 0.188*                 | 0.337**  | 0.497**         | 0.113 | 1       |                   |
| PM <sub>2.5</sub>                    | 0.395**          | 0.230**                        | 0.510**                        | -0.313**      | 0.487**        | -0.319**        | -0.354**               | -0.269**                             | 0.066                  | 0.381**  | 0.532**         | 0.121 | 0.687** | 1                 |

Value is expressed as the Pearson product-moment correlation coefficient. \*  $p < 0.05$ , \*\*  $p < 0.01$ . Abbreviations: NO, nitrogen monoxide; NO<sub>2</sub>, nitrogen dioxide; Ox, photochemical oxidant; SPM, suspended particulate matter; PM<sub>2.5</sub>, fine particulate matter.

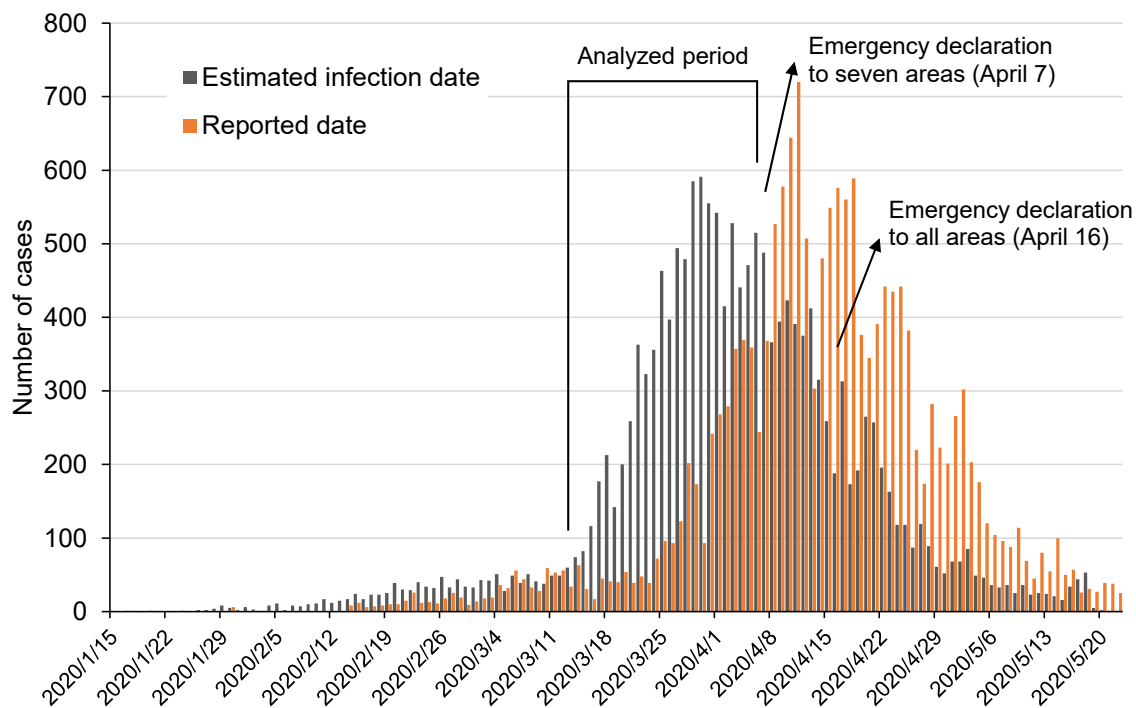

Figure S1. Number of COVID-19 cases in Japan as of May 22, 2020

Data on the basis of the estimated date of the infection is shown as gray band. Data on the basis of the reported date is shown as orange band. Seven areas are Saitama, Chiba, Tokyo, Kanagawa, Osaka, Hyogo, and Fukuoka prefectures.

Reference of data on the basis of the reported date

NHK (Japan Broadcasting Corporation), 2020. Reported number of COVID-19 cases in Japan, summary counts by the NHK. Available at: <https://www3.nhk.or.jp/news/special/coronavirus/data-all/>, accessed on June 22, 2020.

Bubble plots of the confirmed rate ratio of COVID-19 on the y-axis against exposure variables on the x-axis were constructed, and prediction lines and 95% confidence bands for the univariate association with epidemic growth for exposure variables were superimposed for showing the trend of the results of statistical analyses.

(a) Mean temperature

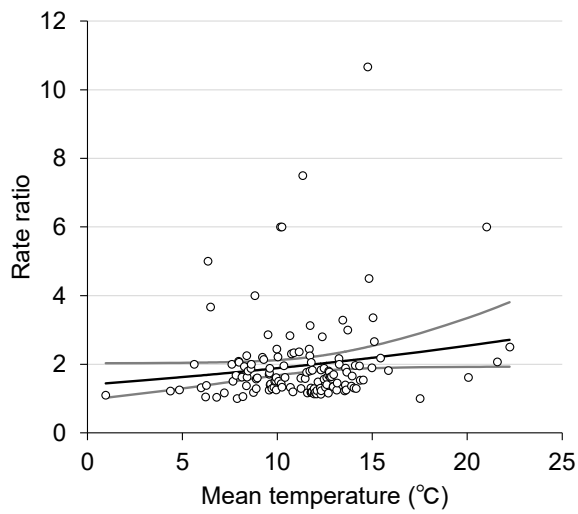

(b) Mean daily minimum temperature

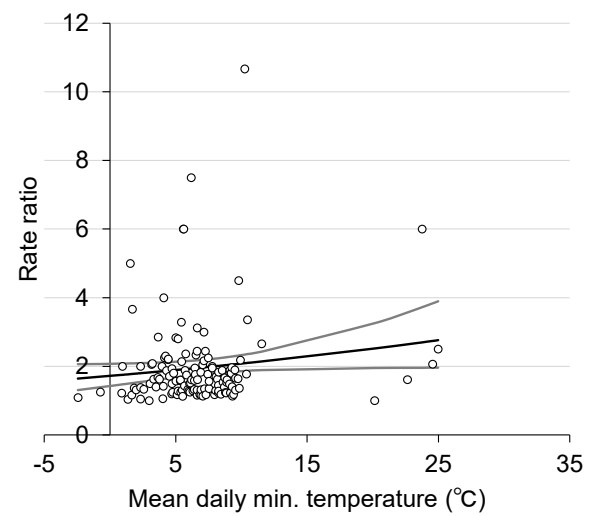

(c) Mean Daily maximum temperature

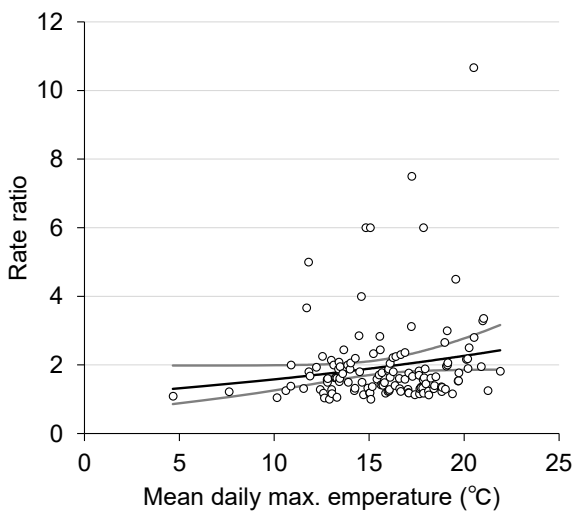

(d) Precipitation

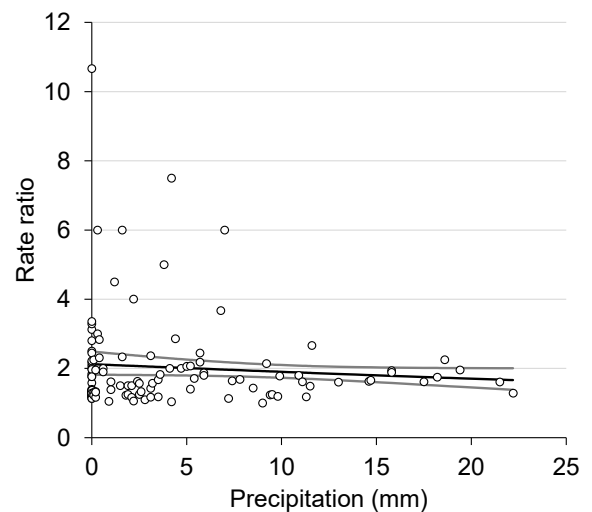

(e) Sunshine hours

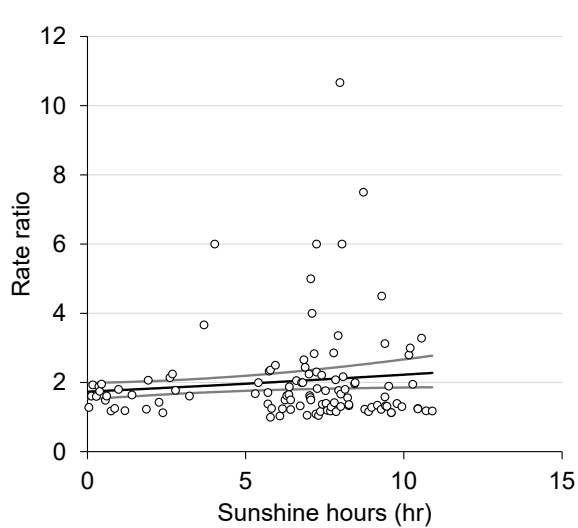

(f) Wind speed

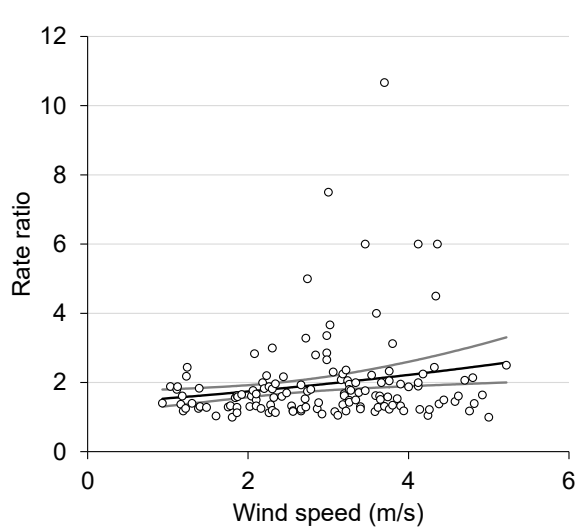

(g) Mean relative humidity

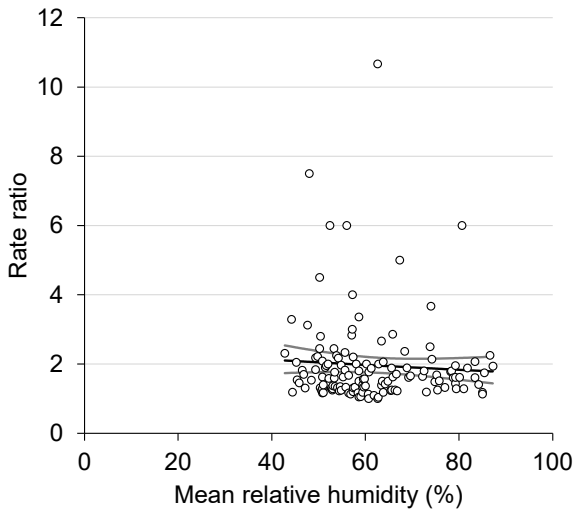

(h) Mean daily minimum relative humidity

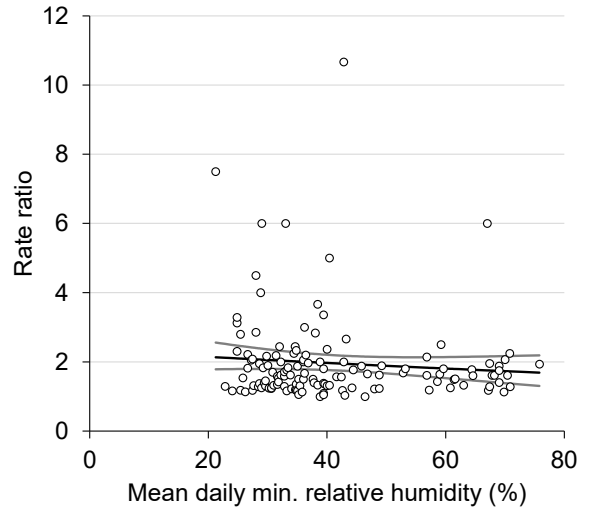

(i) Mean absolute humidity

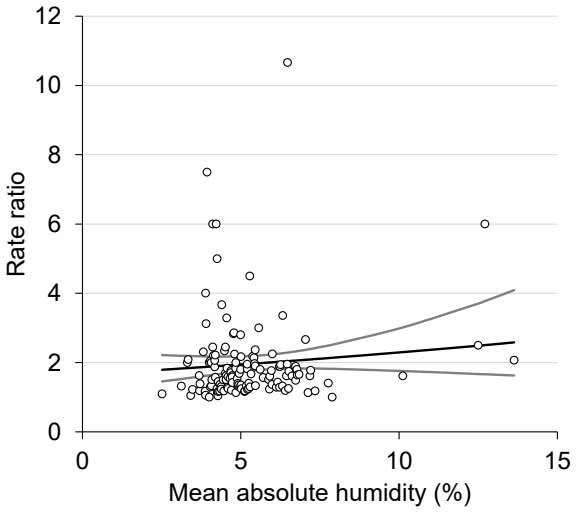

(j) NO

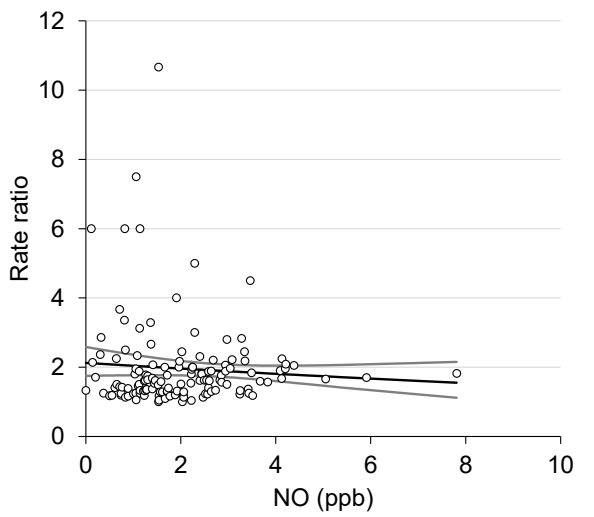

(k) NO<sub>2</sub>

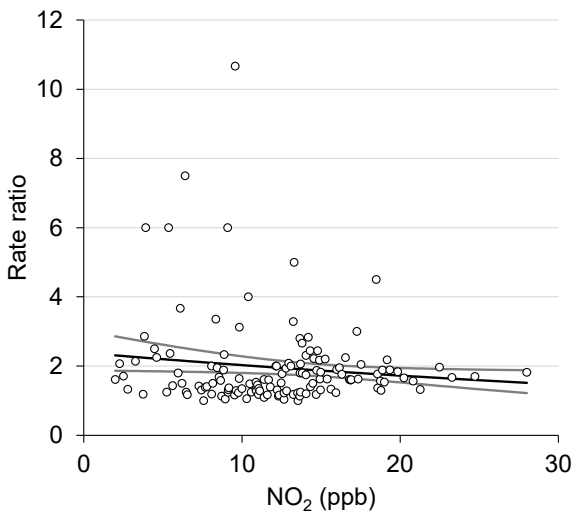

(l) Ox

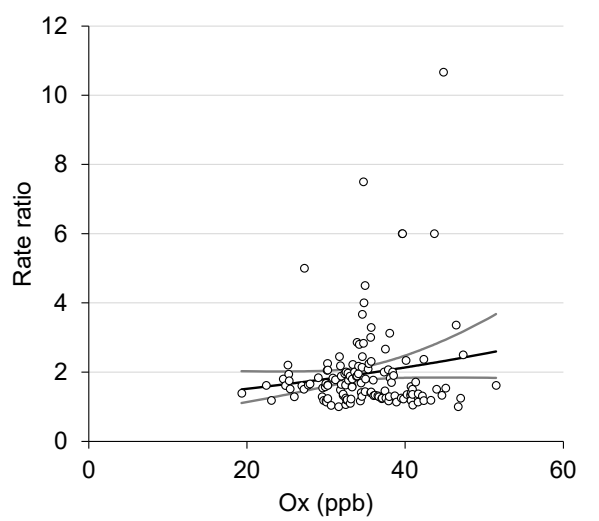

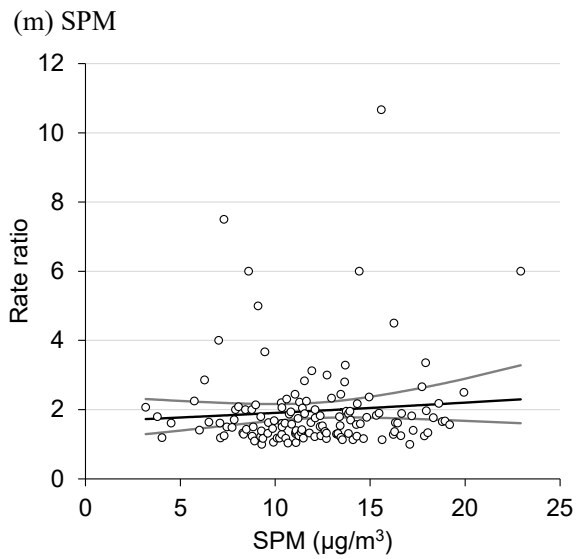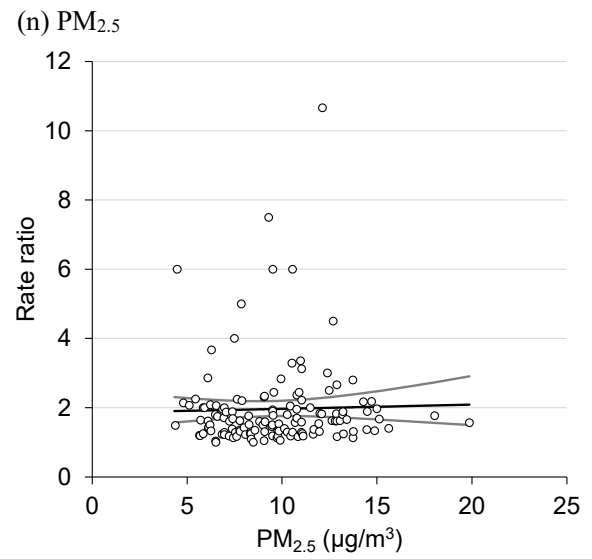

Figure S2. Bubble plot of epidemic growth against climate factors and ambient air pollutants

Each bubble represents a geographical area ( $n = 28$ ). Prediction line and 95% confidence band are for the univariate association of epidemic growth with climate factors and ambient air pollutants temperature from random-effects regression with inverse-variance weights. Abbreviations: NO, nitrogen monoxide; NO<sub>2</sub>, nitrogen dioxide; Ox, photochemical oxidant; SPM, suspended particulate matter; PM<sub>2.5</sub>, fine particulate matter.
